# Supplementary material for: DNA binding, cytotoxic effects and probable targets of an oxindolimine–vanadyl complex as an antitumor agent
Source: Royal Society of Chemistry journal article supplement (doi:10.1039/c9nj02480h), 2019-01-01
Supplement: c9nj02480h1.pdf [file c9nj02480h1.pdf]

## Supporting Material

Manuscript – Bruno S. Dario et al.

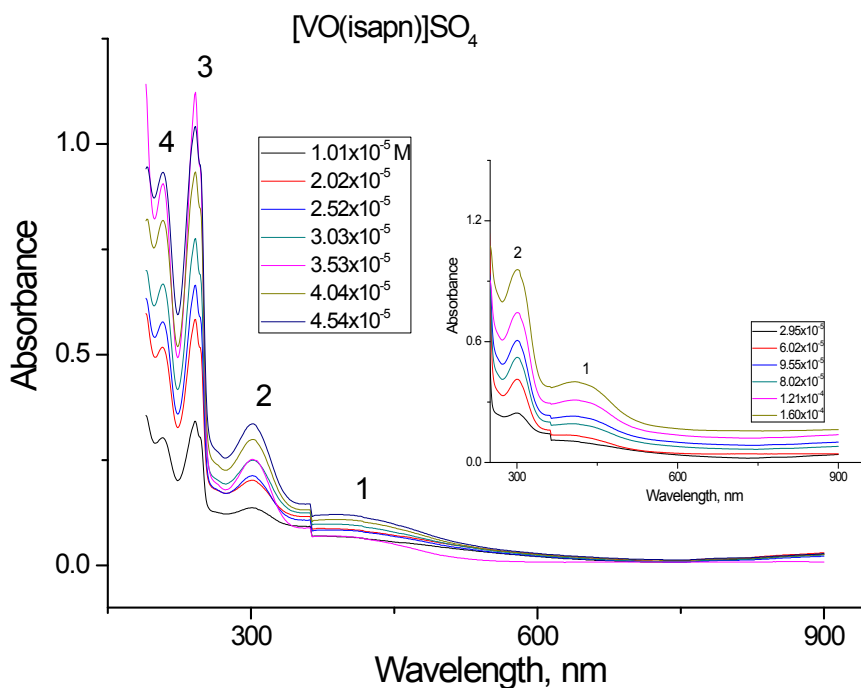

**Figure S1-** Electronic spectra of complex  $[\text{VO}(\text{isapn})]\text{SO}_4$ , in the concentration range of  $1 \times 10^{-5}$  to  $1.6 \times 10^{-4}$  mol/L, in DMSO/aqueous solution.

|                | $\epsilon$ ( $\text{mol}^{-1} \cdot \text{L} \cdot \text{cm}^{-1}$ ) | Transition |
|----------------|----------------------------------------------------------------------|------------|
| Band 1, 408 nm | $2.69 \times 10^3$                                                   | LMTC       |
| Band 2, 300 nm | $5.47 \times 10^3$                                                   | LMTC       |
| Band 3, 242 nm | $1.93 \times 10^4$                                                   | IL         |
| Band 4, 207 nm | $1.72 \times 10^4$                                                   | IL         |

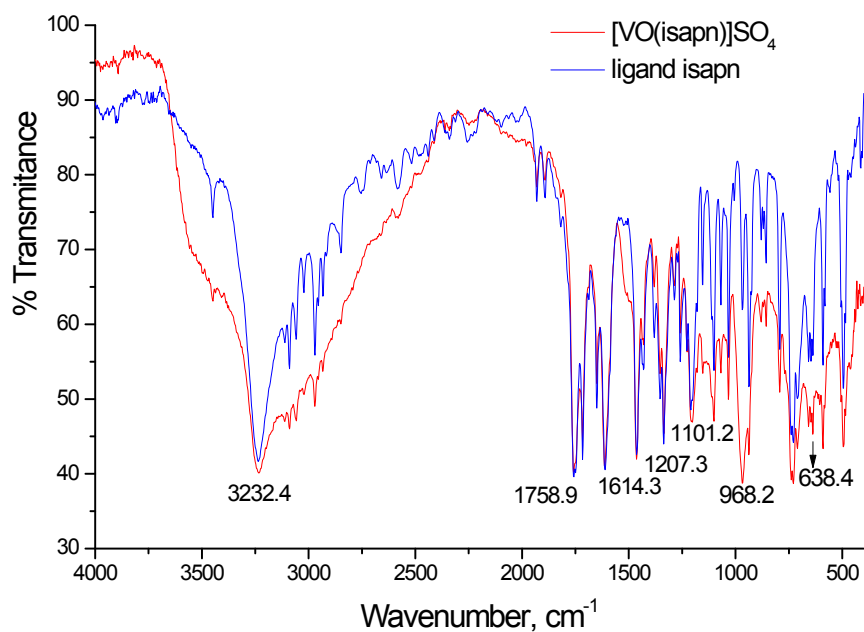

**Figure S2** – FTIR spectra of ligand isapn and corresponding complex  $[\text{VO}(\text{isapn})]$ , in KCl pellets, with main bands signalized.

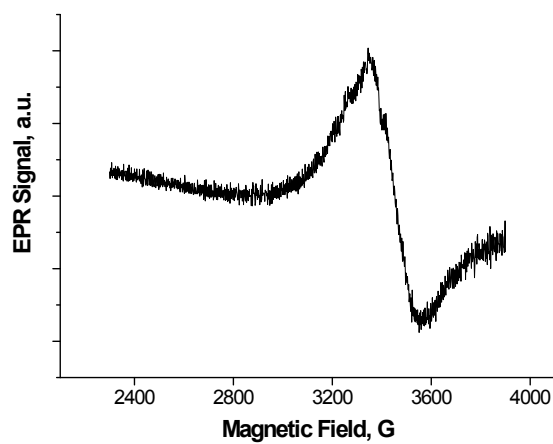

**Figure S3** - EPR spectra of complex  $[\text{VO}(\text{isapn})]\text{SO}_4$  in solid state, at room temperature, with  $g_{\text{iso}} = 1.960$ .

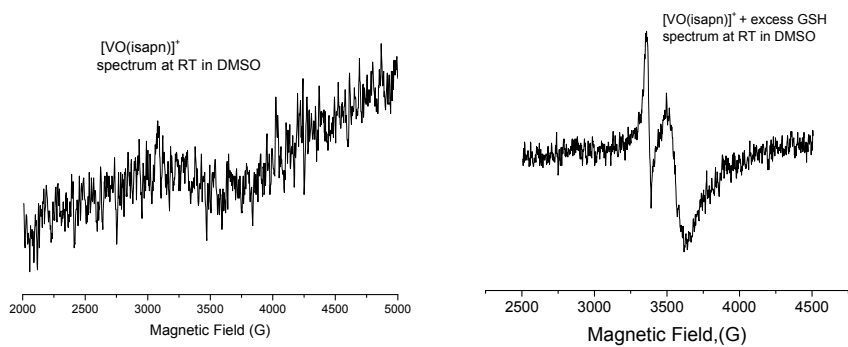

**Figure S4** – EPR spectra of complex  $[\text{VO}(\text{isapn})]\text{SO}_4$  in DMSO solution at RT, with and without addition of excess glutathione.

A)

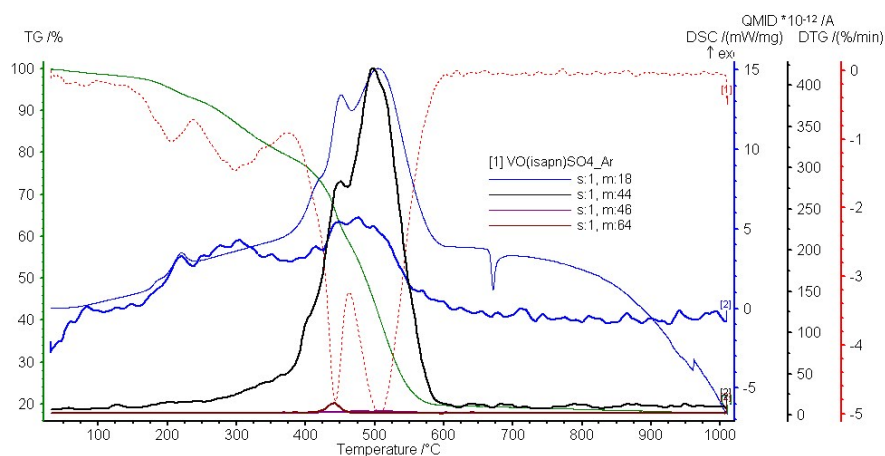

B)

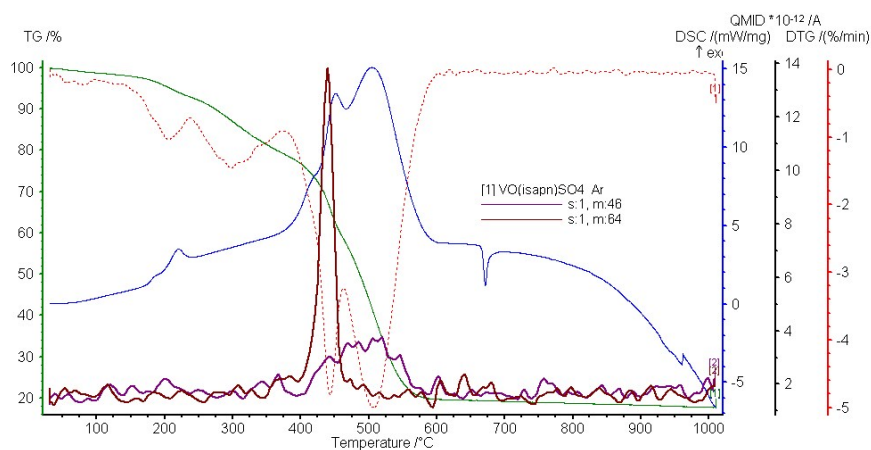

C)

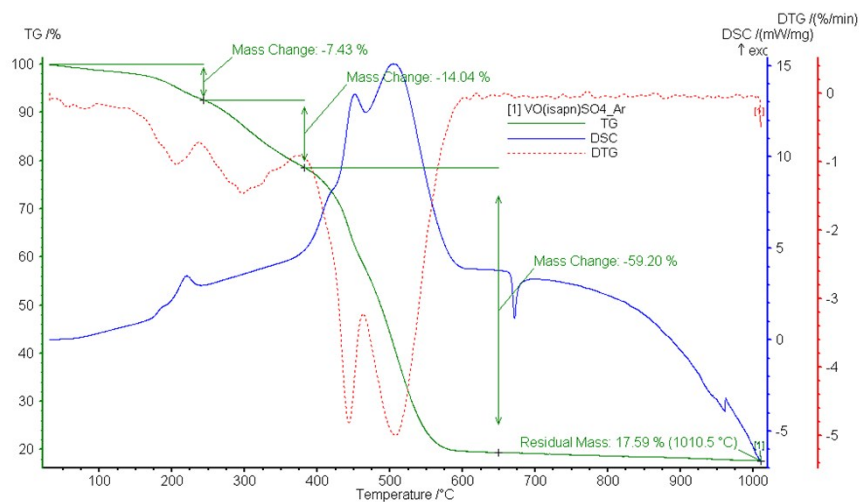

**Figure S5-** Thermogravimetric curves of complex [VO(isapn)] up to 1000°C, under air. A) Release of water ( $m/z = 18$ ) and  $\text{CO}_2$  ( $m/z = 44$ ); B) Release of  $\text{SO}_2$  ( $m/z = 64$ ); C) DSC and DTG curves. Final residue: probably  $\text{V}_2\text{O}_5$  (orange powder).
